# Supplementary material
Source: publisher figshare collection journal article supplement (https://sage.figshare.com/ndownloader/files/14375837)

# Endovascular Therapy for Erectile Dysfunction – Who Benefits Most? Insights From a Single-Center Experience

Nicolas Diehm et al. *J Endovasc Ther.* 2019;26(2)

**Supplemental Figure 1.** (A) Change of the 15-item International Index of Erectile Function score from baseline to 12 months and differences between subgroups per (B) univariable and (C) multivariable analysis. CAD, coronary artery disease; DCB, drug-coated balloon; DES, drug-eluting stent; PAD, peripheral artery disease; PDE5, phosphodiesterase type 5; RVD, reference vessel diameter. <sup>a</sup>Former or current smokers. <sup>b</sup>Chronic prostatitis, previous prostate surgery, or hypogonadism. <sup>c</sup>Beta-blockers, psychotropic drugs, or thiazide diuretics. <sup>d</sup>PDE5 inhibitors or intracavernosal prostaglandin prior to intervention. <sup>e</sup>Distal pudendal artery or distally located arteries.

## A Change of the IIEF-15 score from baseline to 12 months

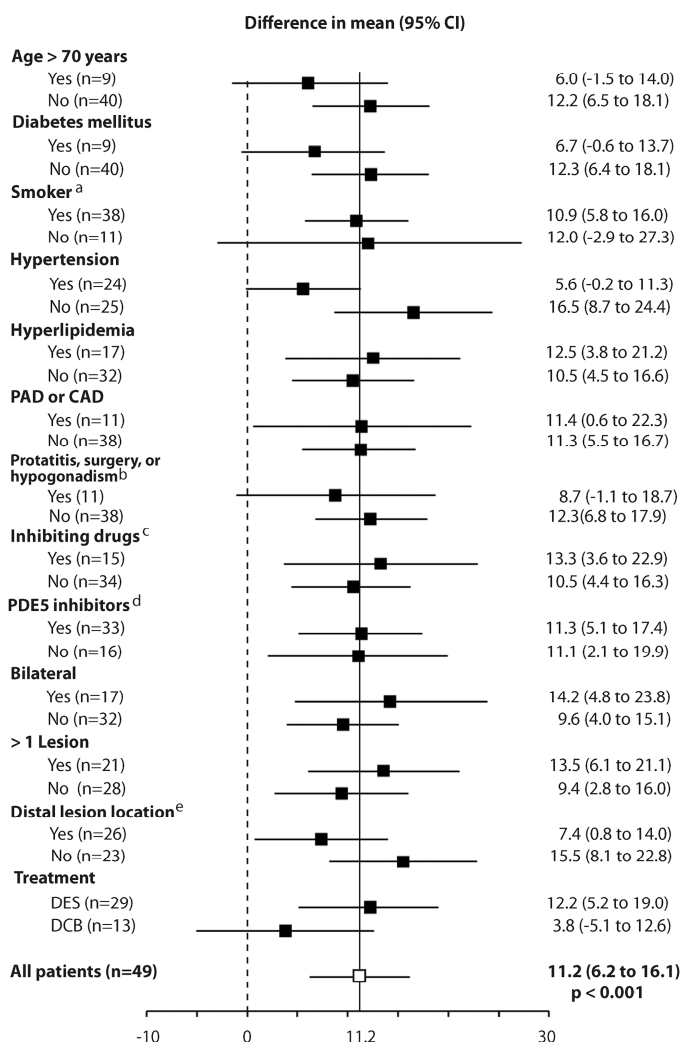

## B Difference in IIEF-15 change between subgroups

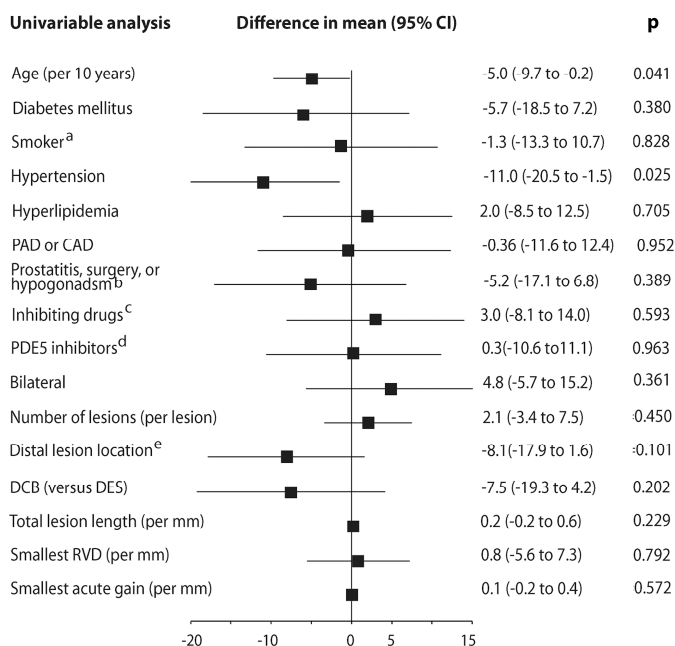

## C

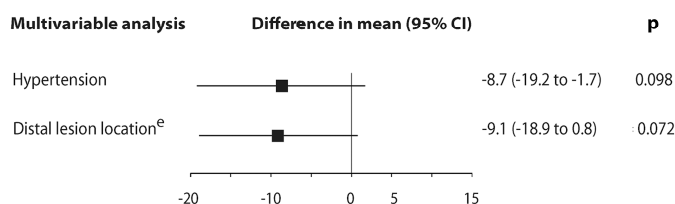

# Endovascular Therapy for Erectile Dysfunction – Who Benefits Most? Insights From a Single-Center Experience

Nicolas Diehm et al. *J Endovasc Ther.* 2019;26(2)

**Supplemental Figure 2.** Change in the ability to achieve penetration or to maintain erection based on IIEF questions 3 and 4 of the 15-item International Index of Erectile Function score from baseline to 12 months depending on patient-, lesion-, and procedure-related subgroups per (A) univariable and (B) multivariable analysis. CAD, coronary artery disease; DCB, drug-coated balloon; DES, drug-eluting stent; PAD, peripheral artery disease; PDE5, phosphodiesterase type 5; RVD, reference vessel diameter. <sup>a</sup>Former or current smokers. <sup>b</sup>Chronic prostatitis, previous prostate surgery, or hypogonadism. <sup>c</sup>Beta-blockers, psychotropic drugs, or thiazide diuretics. <sup>d</sup>PDE5 inhibitors or intracavernosal prostaglandin prior to intervention. <sup>e</sup>Distal pudendal artery or distally located arteries.

## A Univariable analysis

### Difference in change within 1 year between subgroups

- IIEF Q3 ability to achieve penetration
- IIEF Q4 ability to maintain erection

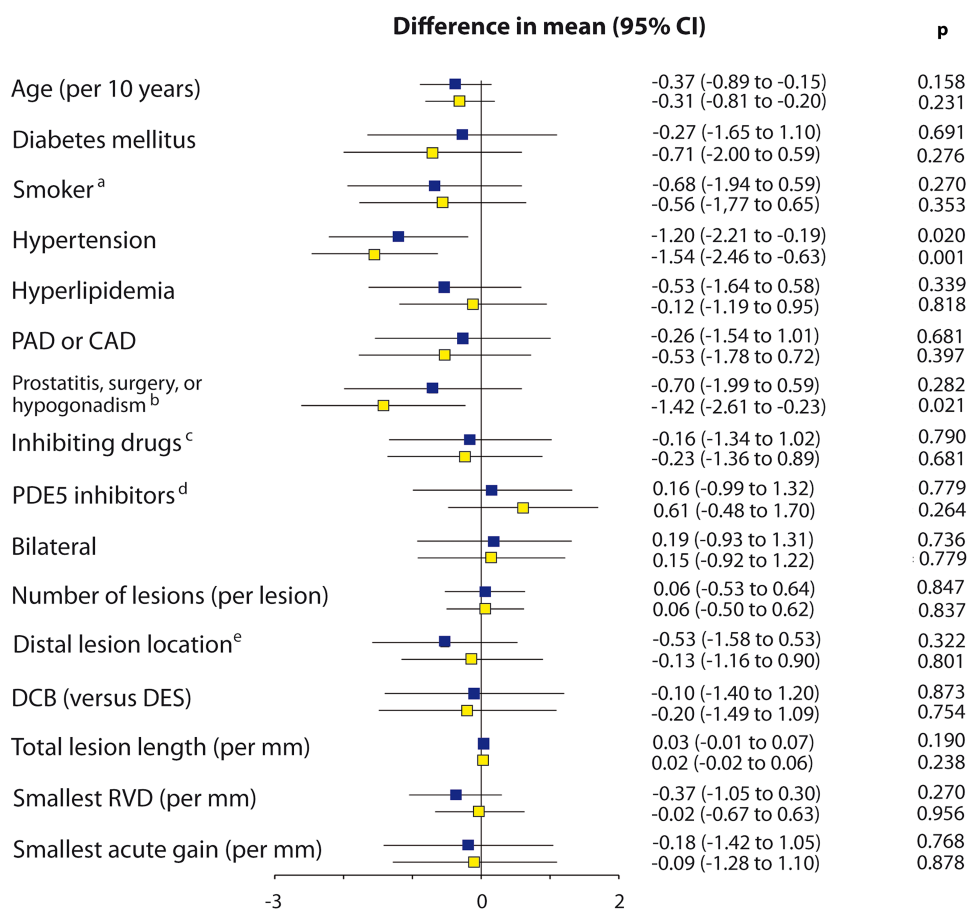

## B Multivariable analysis

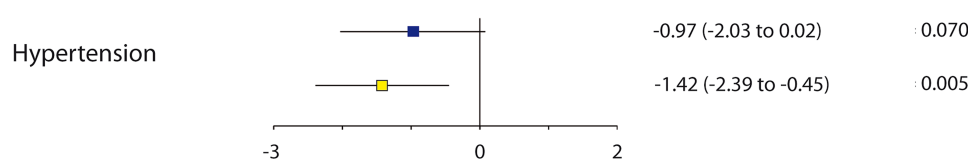

Supplement: Supplementary file 1 [file 14375837]
